# Supplementary material
Source: PubMed Central journal article supplement (PMC1766443)

**a**

L P C L E Q E G M I  
 L P C            N K K V \*  
 TTACCTTGTCTTGAACAAGAAGGTATGATC  
 AATGGAACAGAAC          TGTTCTTCCATACTAG

306

937-940 bp

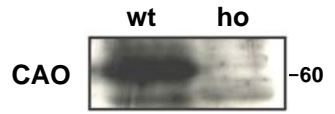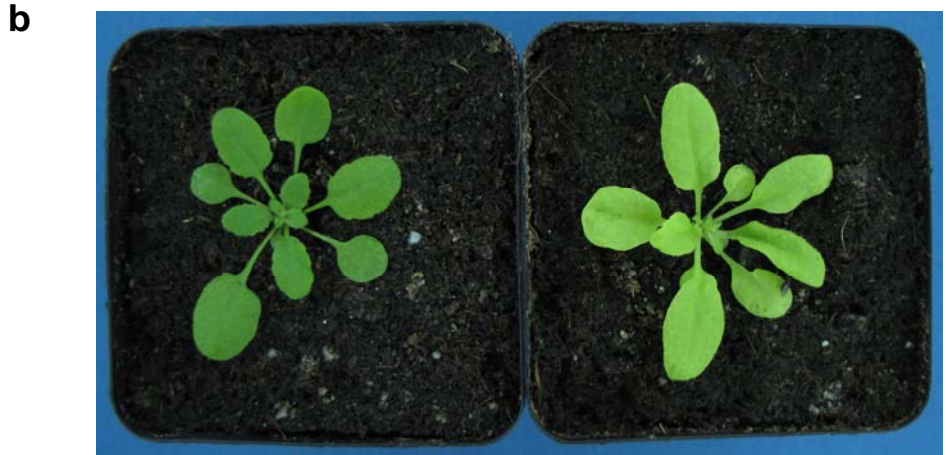

**wt (Col-0)**

**cao-1**

**total Chl: 1230.5 ± 26.6**

**516.2 ± 125.9 (nmol/g FW)**

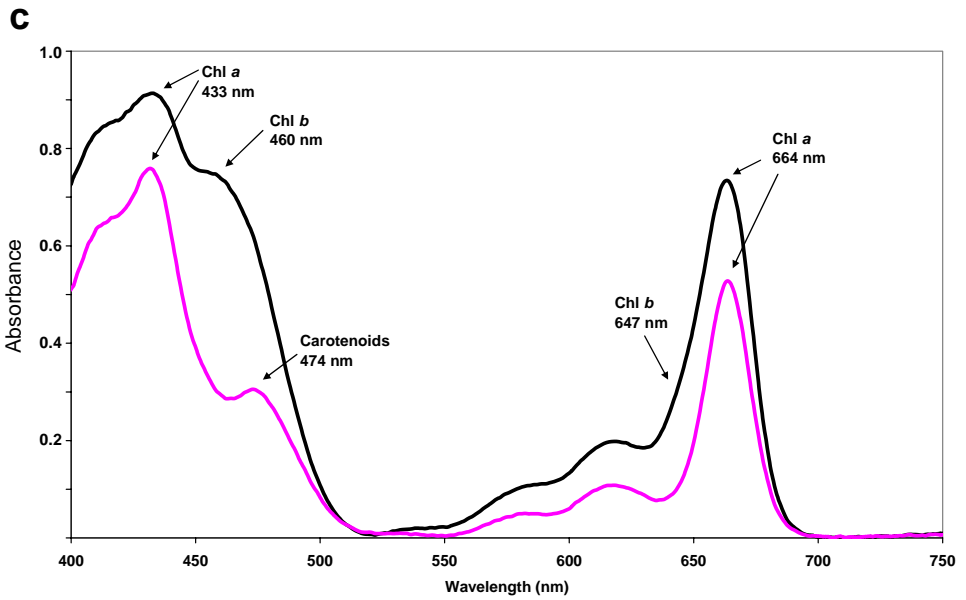

Supplement: pnas_0610062104_1.pdf [file pnas_0610062104_1.pdf]
